# Supplementary material
Source: MDPI journal article supplement (https://www.mdpi.com/2304-6740/11/9/348)
Supplement: s1 [file s1]

*Supporting Information for*

## **Anion Capture at the Open Core of a Geometrically Flexible Dicopper(II,II) Macrocyclic Complex**

Sam H. Brooks, Corey A. Richards, Patrick J. Carroll, Michael R. Gau, and Neil C. Tomson\*

*Department of Chemistry, University of Pennsylvania, Philadelphia, Pennsylvania 19104, United States*

\* [tomson@upenn.edu](mailto:tomson@upenn.edu)

### **Table of Contents:**

|             |                                    |            |
|-------------|------------------------------------|------------|
| <b>I.</b>   | <b>NMR SPECTRA .....</b>           | <b>S2</b>  |
| <b>II.</b>  | <b>INFRARED SPECTRA .....</b>      | <b>S4</b>  |
| <b>III.</b> | <b>UV-vis-NIR SPECTRA .....</b>    | <b>S10</b> |
| <b>IV.</b>  | <b>X-RAY CRYSTALLOGRAPHY .....</b> | <b>S23</b> |

## I. NMR Spectra

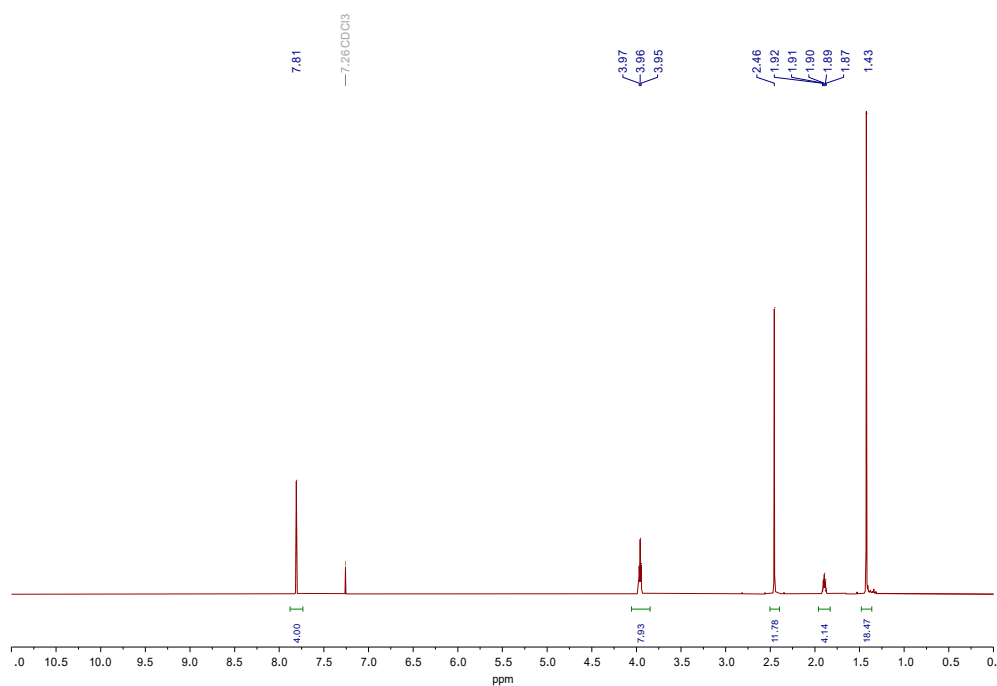

**Figure S1**  $^1\text{H}$  NMR spectrum of  $^3[\text{Sr}]^{2+}$  in  $\text{CDCl}_3$ .

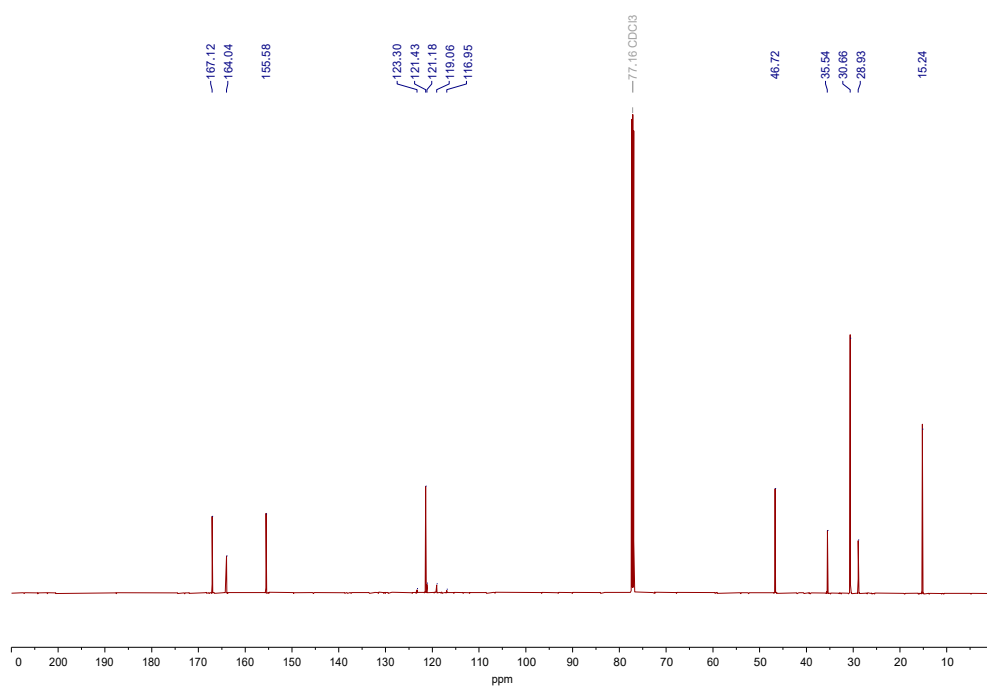

**Figure S2**  $^{13}\text{C}\{^1\text{H}\}$  NMR spectrum of  $^3[\text{Sr}]^{2+}$  in  $\text{CDCl}_3$ .

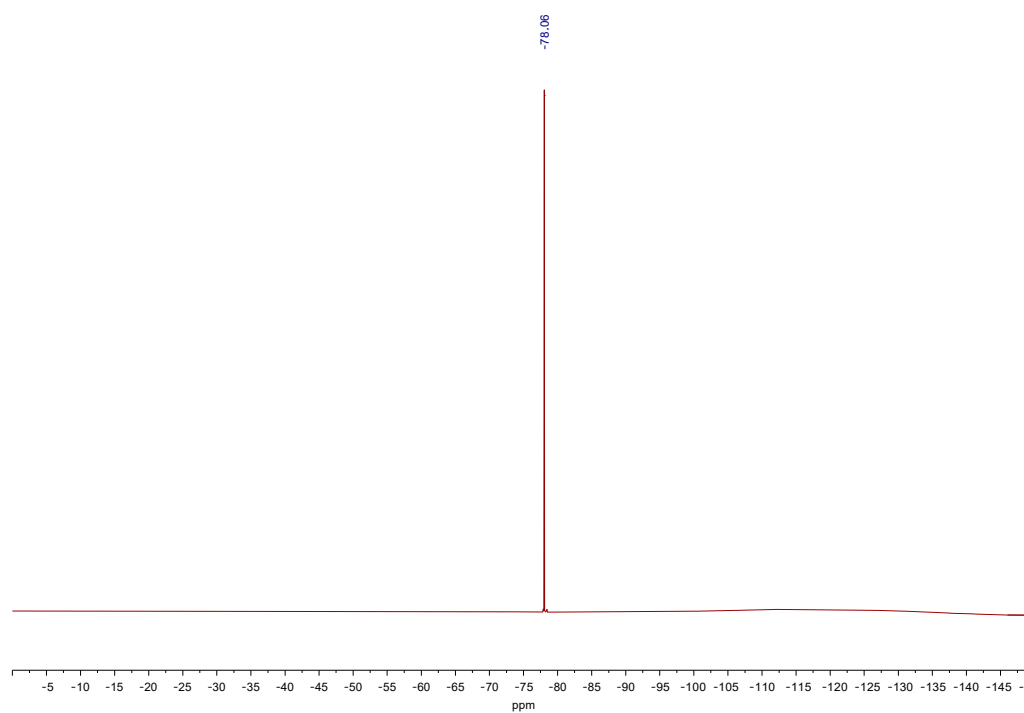

**Figure S3**  $^{19}\text{F}\{^1\text{H}\}$  NMR spectrum of  $^3[\text{Sr}]^{2+}$  in  $\text{CDCl}_3$ .

## II. Infrared Spectra

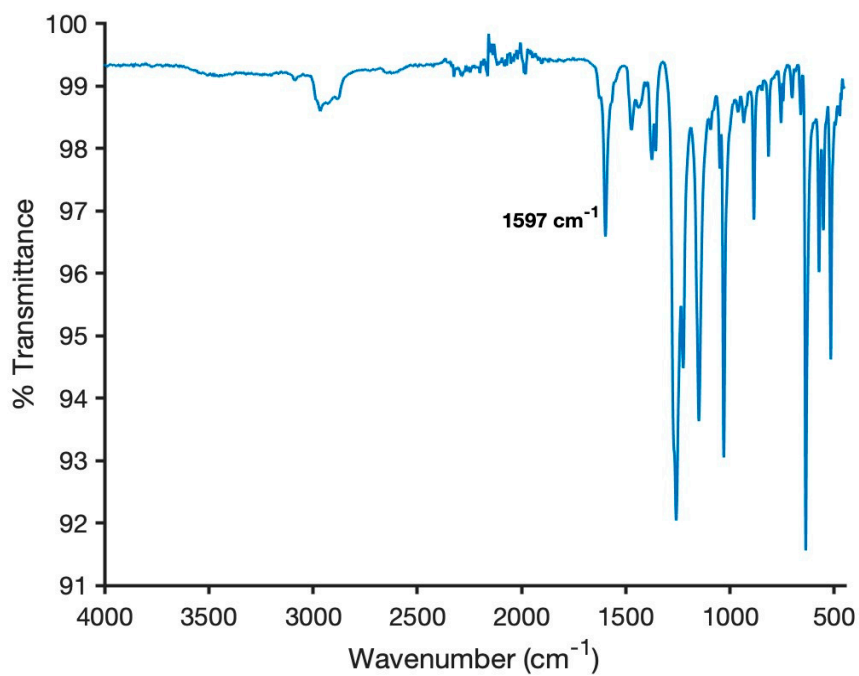

**Figure S4** Infrared spectrum of  $3[\text{Cu}_2\text{Cl}_2]^{2+}$ .

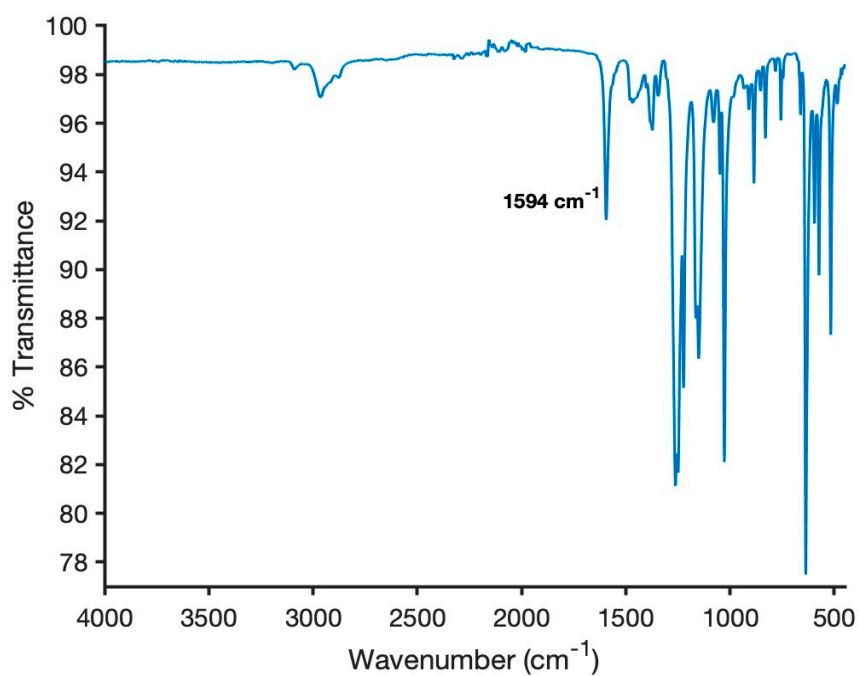

**Figure S5** Infrared spectrum of  $2[\text{Cu}_2\text{Cl}_2]^{2+}$ .

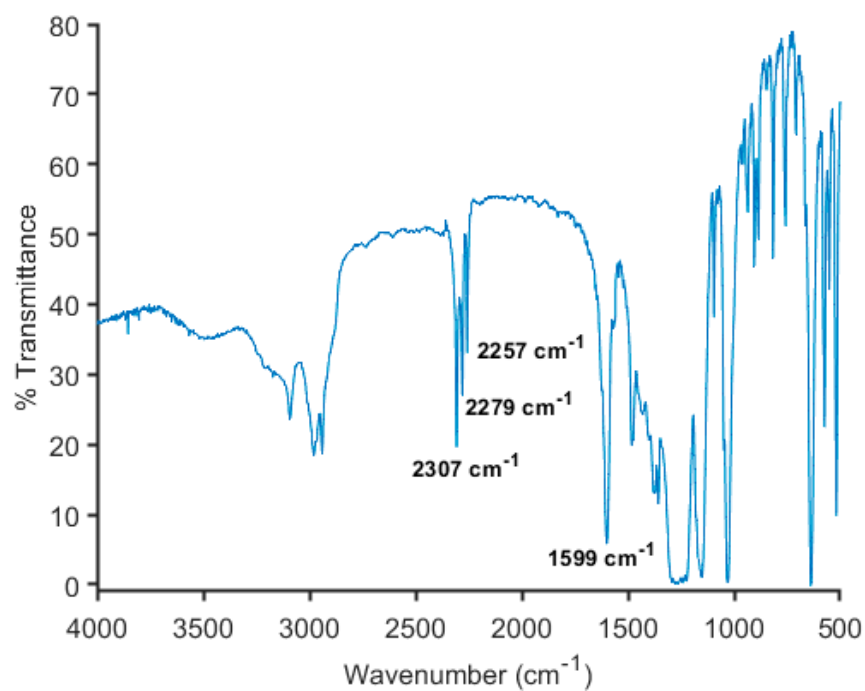

**Figure S6** Infrared spectrum of  $^3[\text{Cu}_2(\text{NCMe})_2]^{4+}$ .

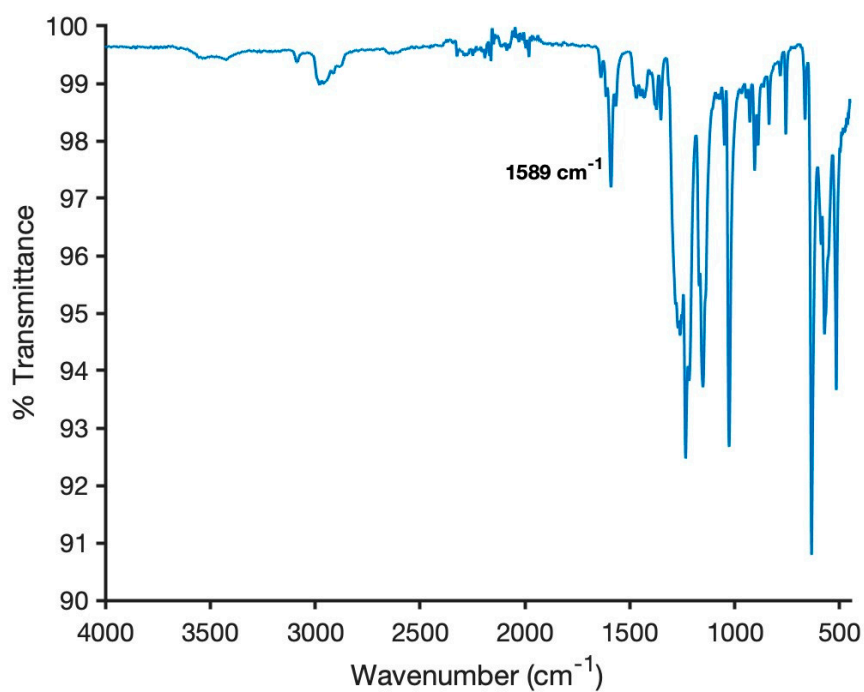

**Figure S7** Infrared spectrum of  $^3[\text{Cu}_2\text{F}]^{3+}$ .

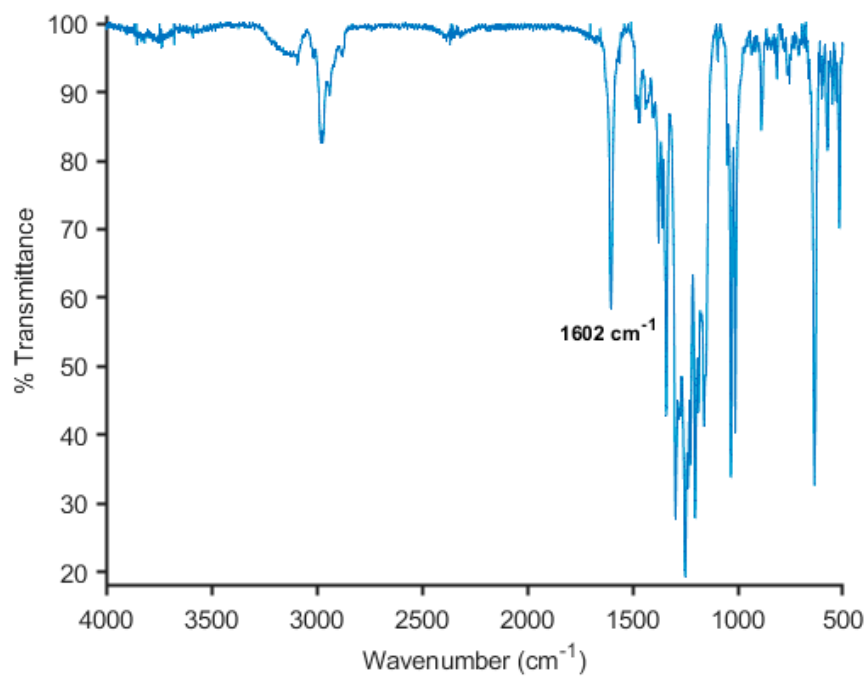

**Figure S8** Infrared spectrum of  $^3[\text{Cu}_2]^{4+}$ .

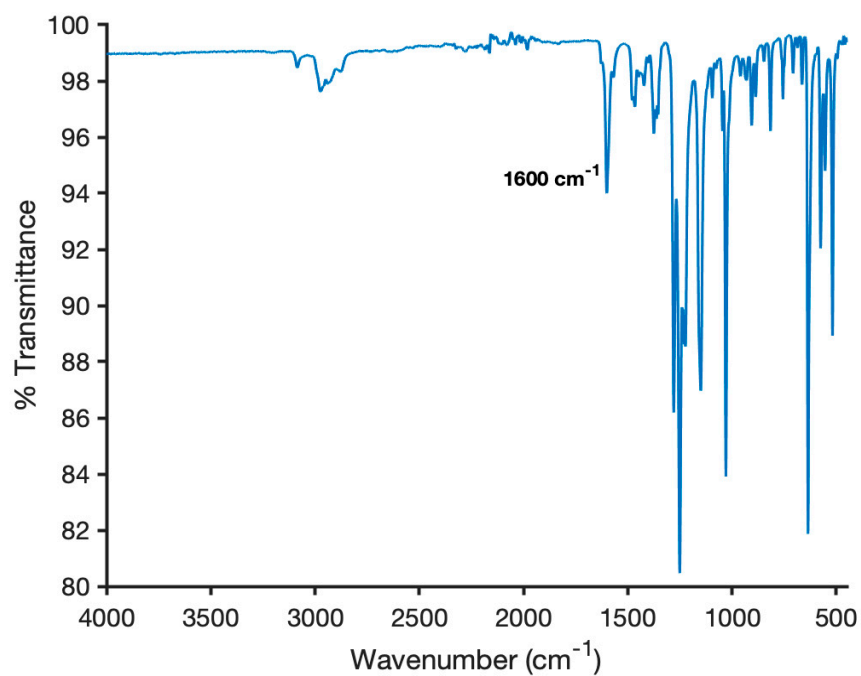

**Figure S9** Infrared spectrum of  $^3[\text{Cu}_2\text{Br}_2]^{2+}$ .

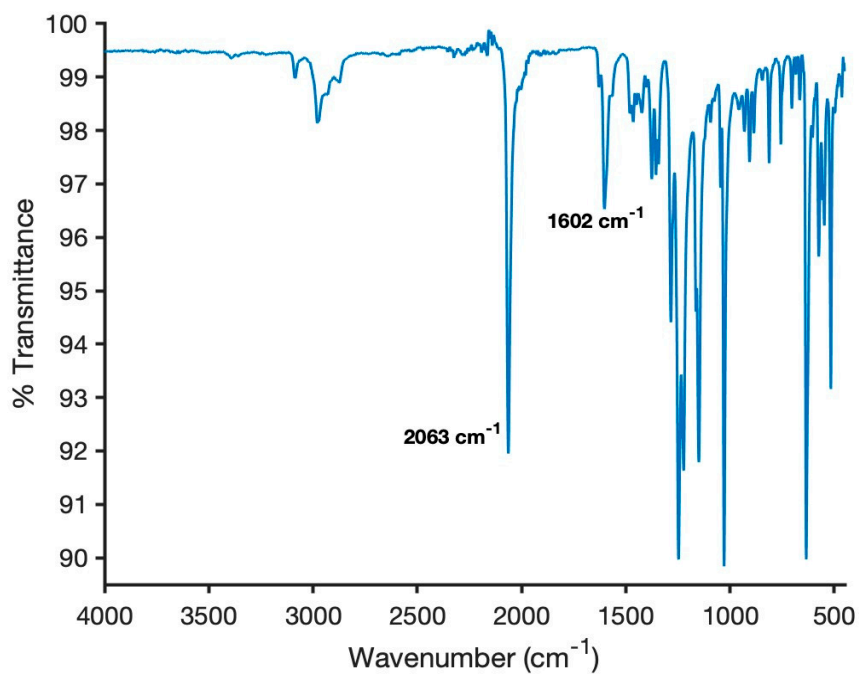

**Figure S10** Infrared spectrum of  $^3[\text{Cu}_2(\text{N}_3)_2]^{2+}$ .

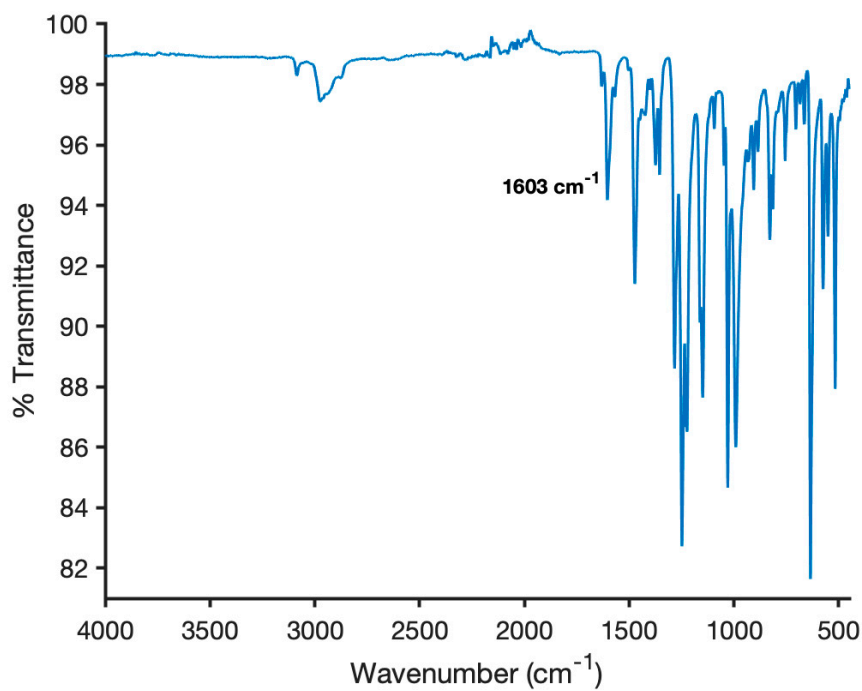

**Figure S11** Infrared spectrum of  $^3[\text{Cu}_2(\text{ONO})_2]^{2+}$ .

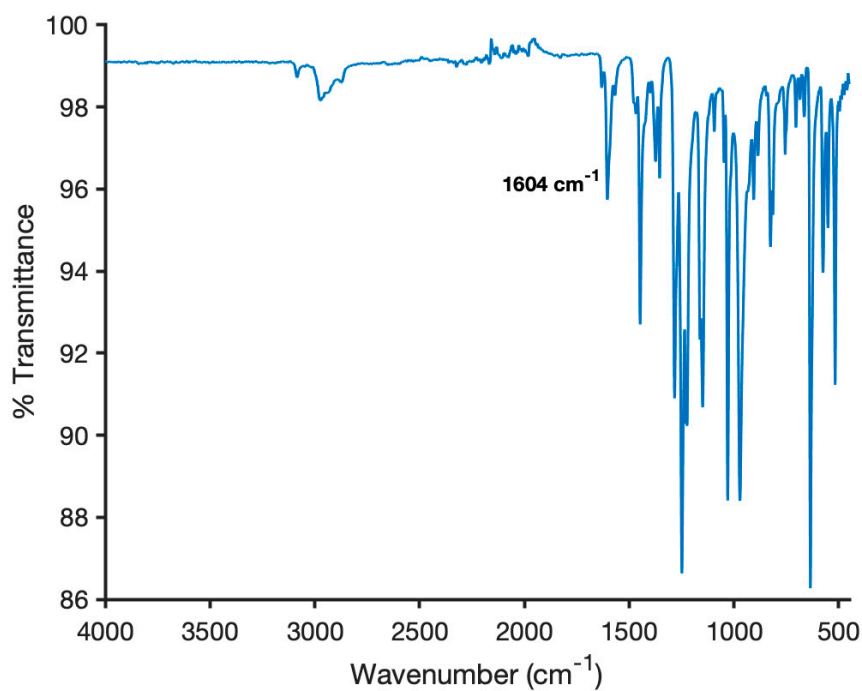

**Figure S12** Infrared spectrum of  $^3[\text{Cu}_2(\text{O}^{15}\text{NO})_2]^{2+}$ .

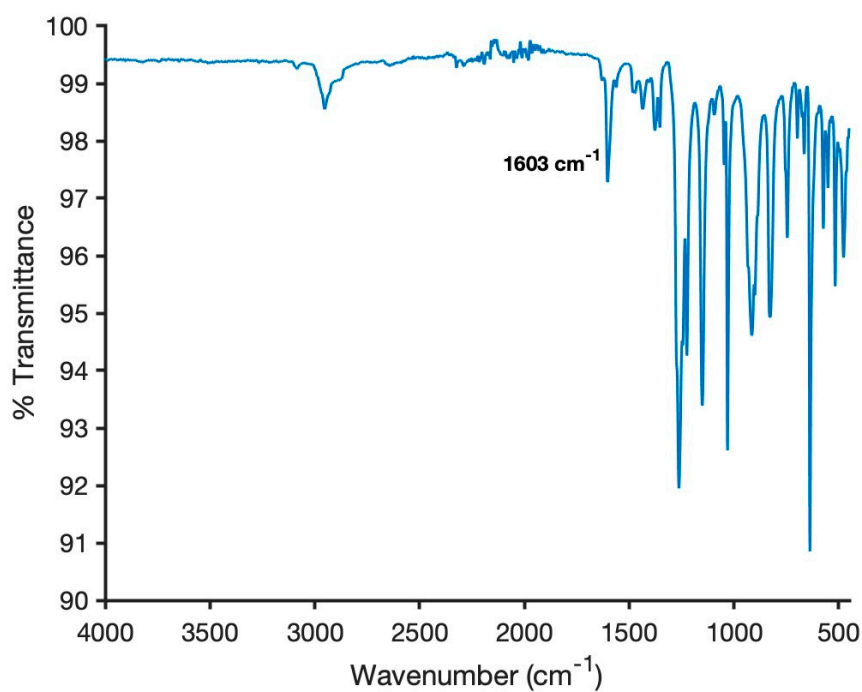

**Figure S13** Infrared spectrum of  $^3[\text{Cu}_2(\text{OTMS})_2]^{2+}$ .



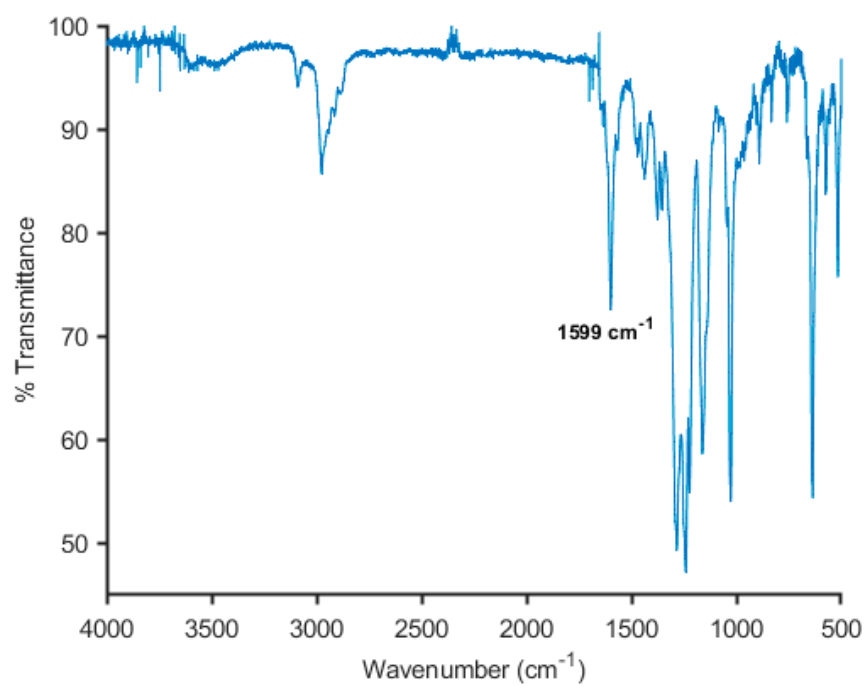

**Figure S14** Infrared spectrum of  $^3[\text{Cu}_2\text{OH}]^{3+}$ .

### III. UV-vis-NIR Spectra

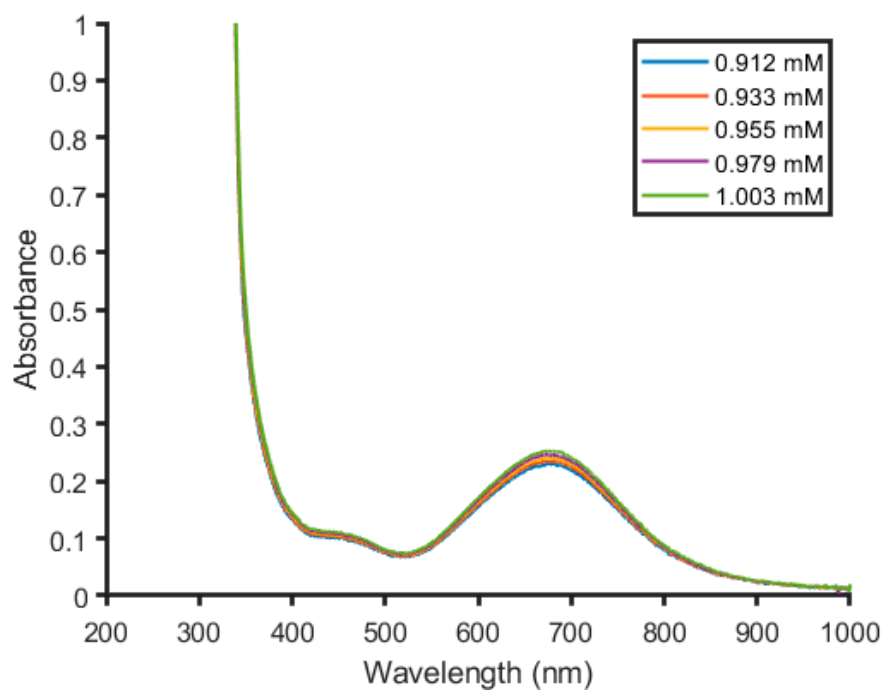

**Figure S15** Beer's law analysis of  $^3[\text{Cu}_2\text{Cl}_2]^{2+}$  at 676 nm.

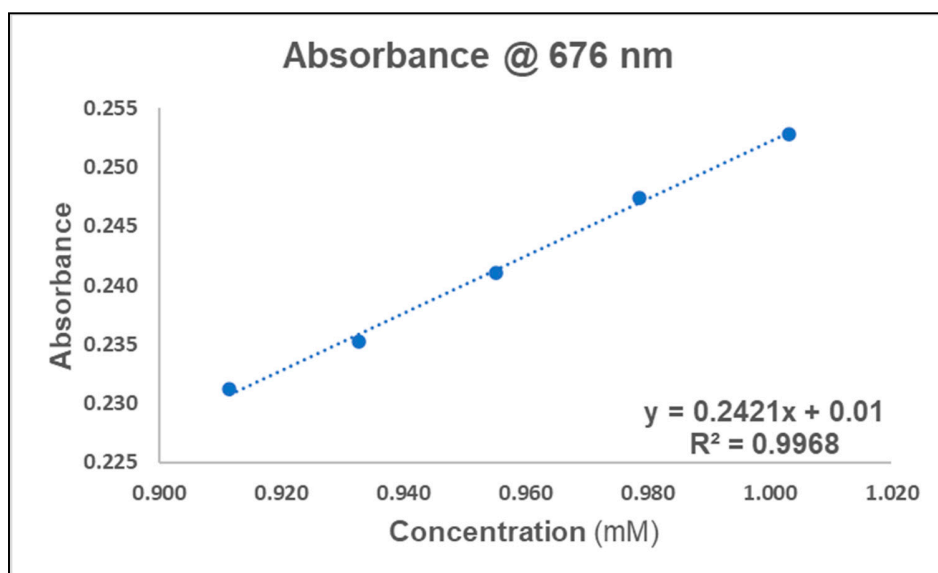

**Figure S16** Linear fit of  $^3[\text{Cu}_2\text{Cl}_2]^{2+}$  absorbance data at 676 nm.

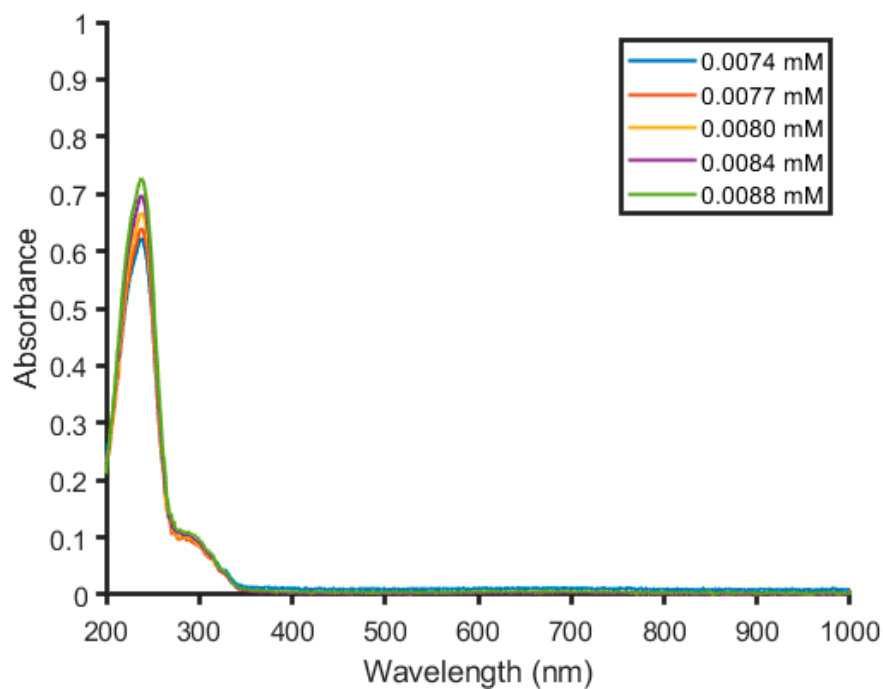

**Figure S17** Beer's law analysis of  $^3[\text{Cu}_2\text{Cl}_2]^{2+}$  at 238 nm.

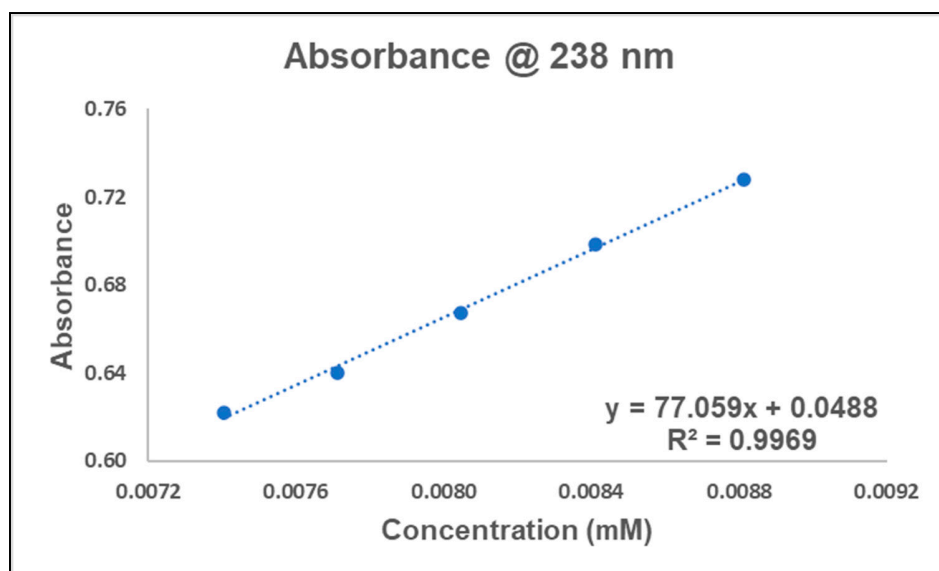

**Figure S18** Linear fit of  $^3[\text{Cu}_2\text{Cl}_2]^{2+}$  absorbance data at 238 nm.

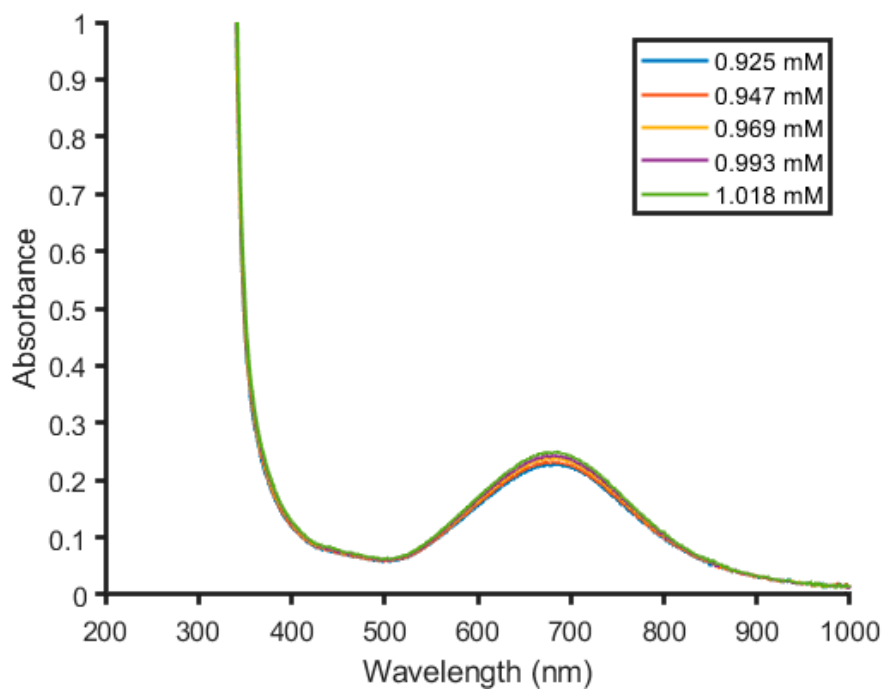

**Figure S19** Beer's law analysis of  $2[\text{Cu}_2\text{Cl}_2]^{2+}$  at 681 nm.

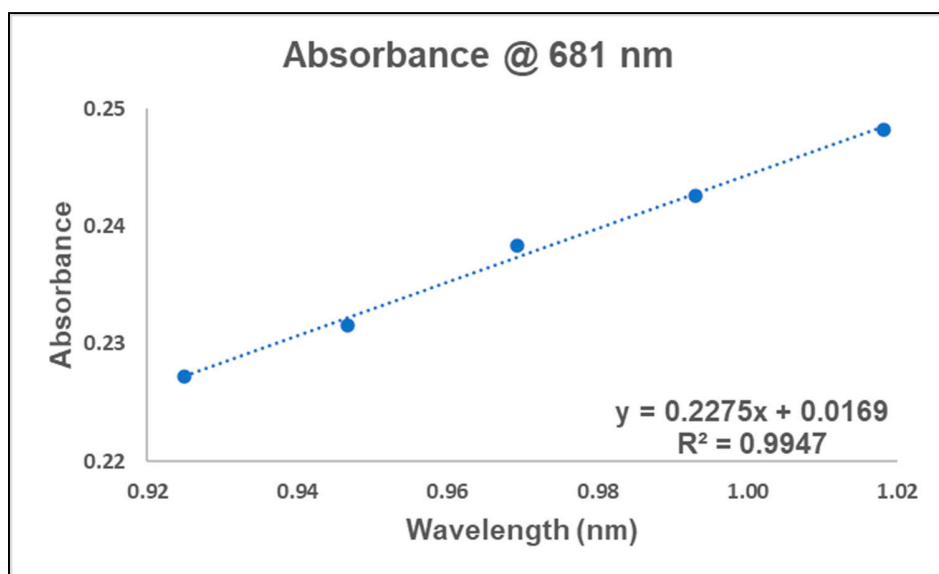

**Figure S20** Linear fit of  $3[\text{Cu}_2\text{Cl}_2]^{2+}$  absorbance data at 681 nm.

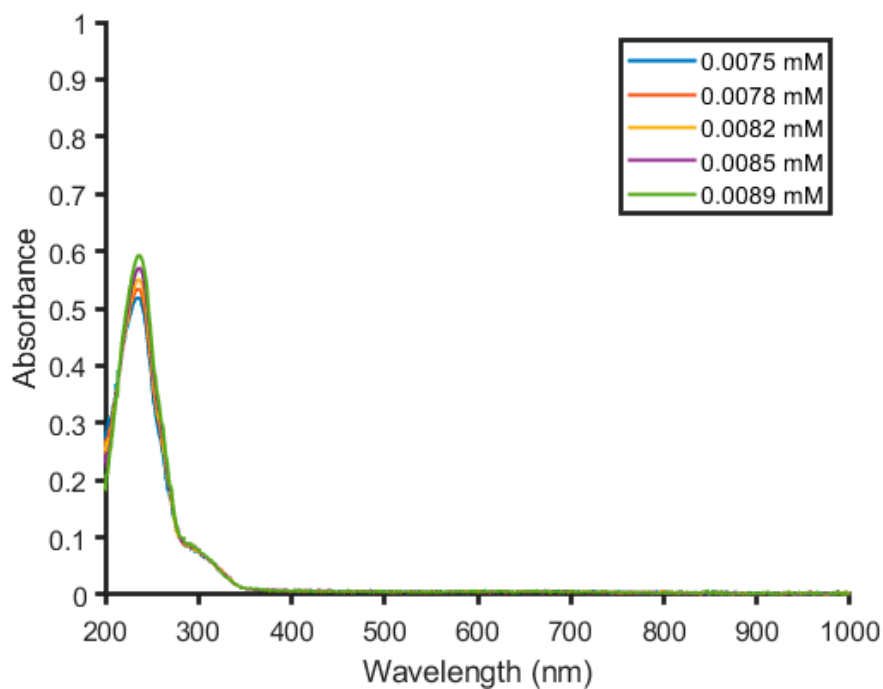

**Figure S21** Beer's law analysis of  $2[\text{Cu}_2\text{Cl}_2]^{2+}$  at 236 nm.

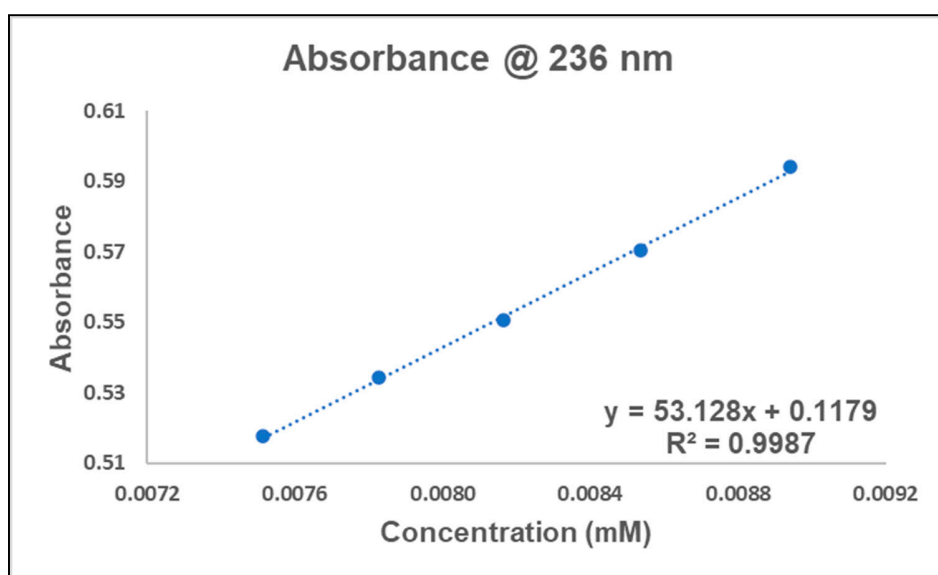

**Figure S22** Linear fit of  $2[\text{Cu}_2\text{Cl}_2]^{2+}$  absorbance data at 236 nm.

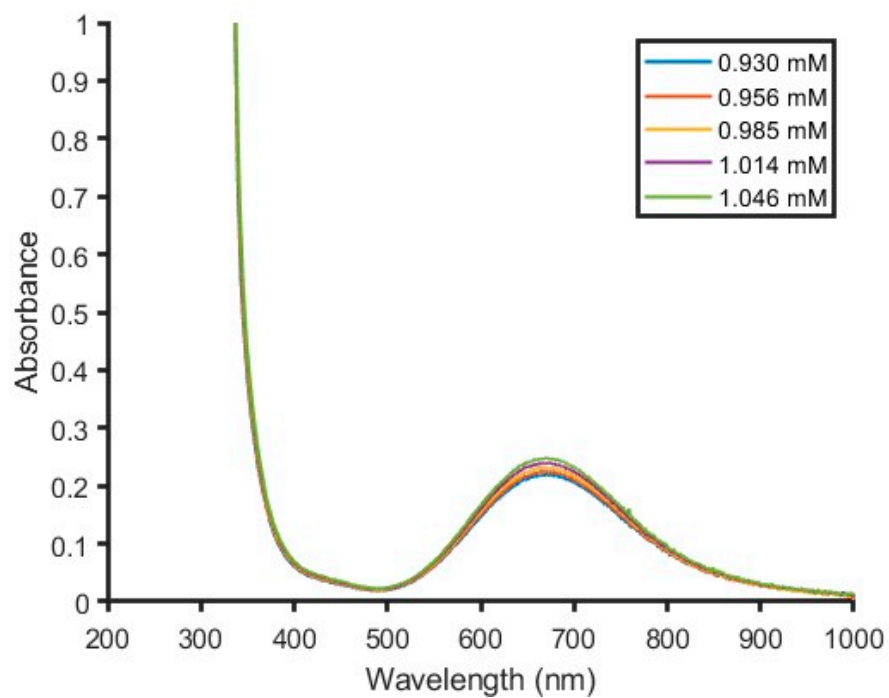

**Figure S23** Beer's law analysis of  $^3[\text{Cu}_2\text{F}]^{3+}$  at 667 nm.

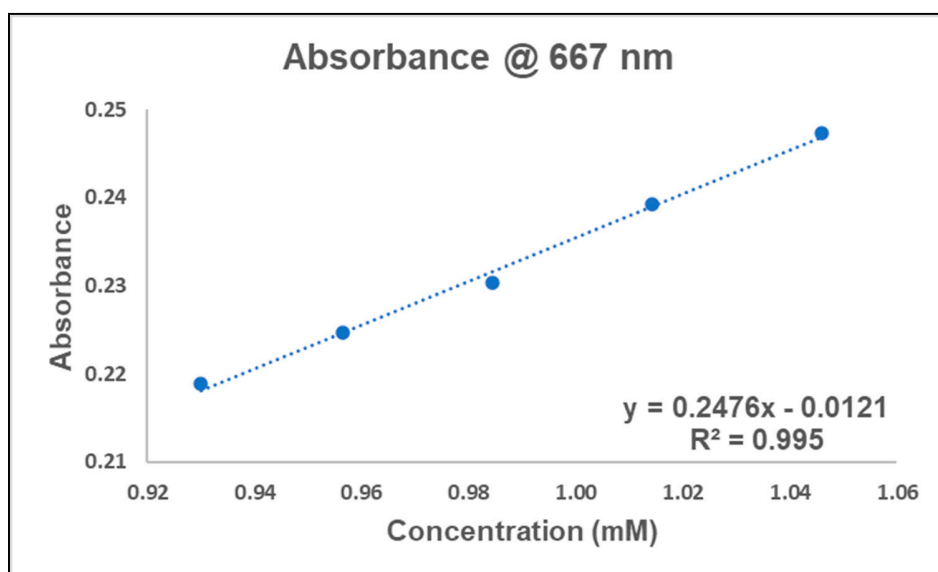

**Figure S24** Linear fit of  $^3[\text{Cu}_2\text{F}]^{3+}$  absorbance data at 667 nm.

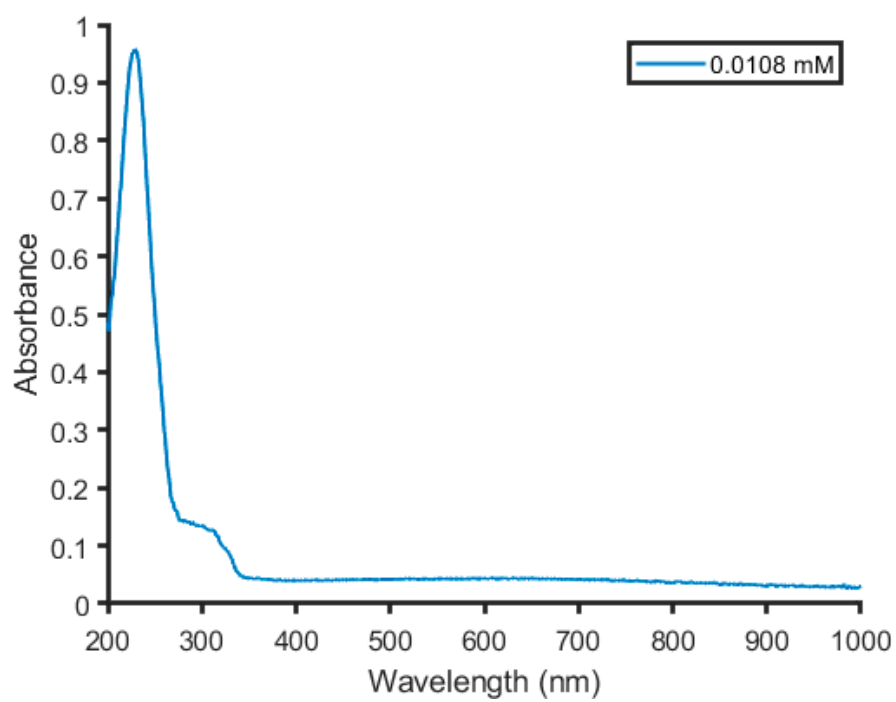

**Figure S25** Representative example of  $^3[\text{Cu}_2\text{F}]^{3+}$   $\pi$ - $\pi^*$  transition at 230 nm.

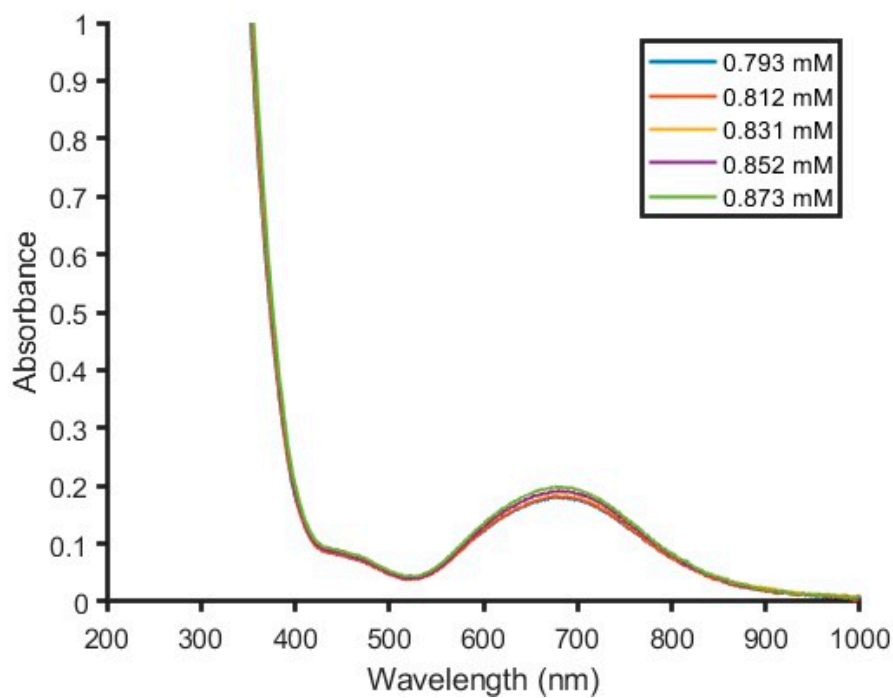

**Figure S26** Beer's law analysis of  $^3[\text{Cu}_2\text{Br}_2]^{2+}$  679 nm.

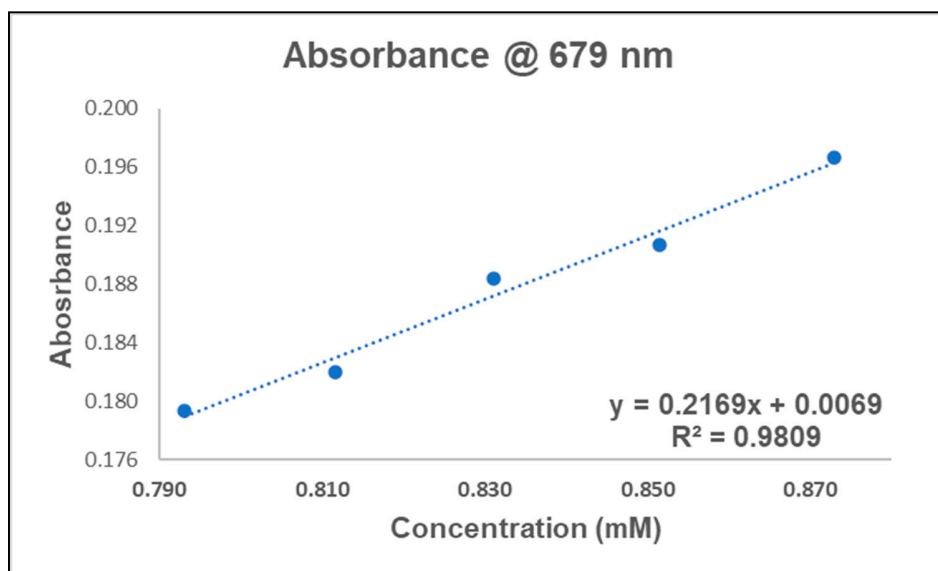

**Figure S27** Linear fit of  $^3[\text{Cu}_2\text{Br}_2]^{2+}$  absorbance data at 679 nm.



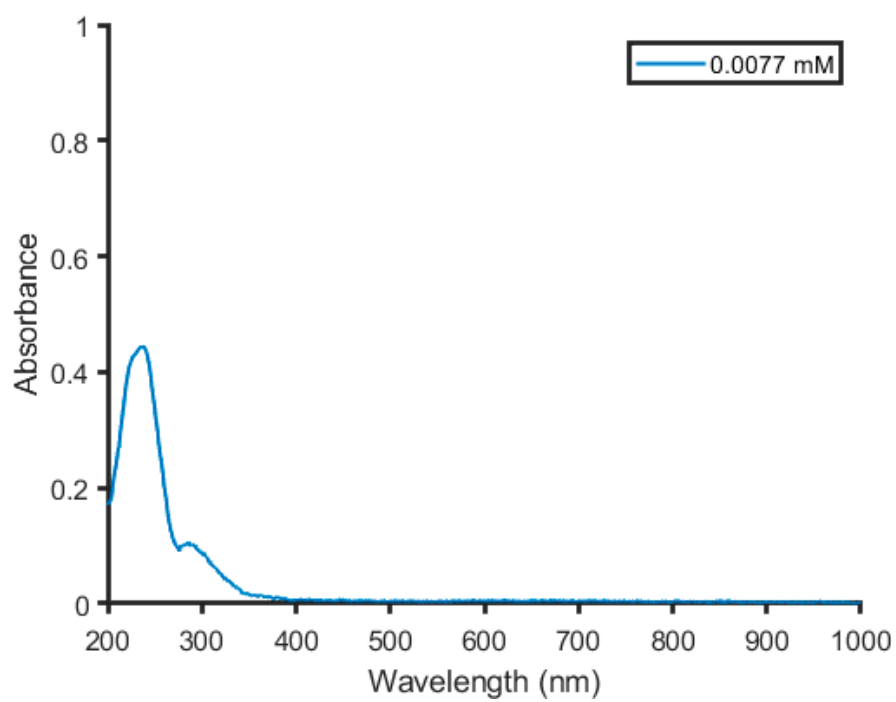

**Figure S28** Representative example of  $^3[\text{Cu}_2\text{Br}_2]^{3+}$   $\pi$ - $\pi^*$  transition at 236 nm.

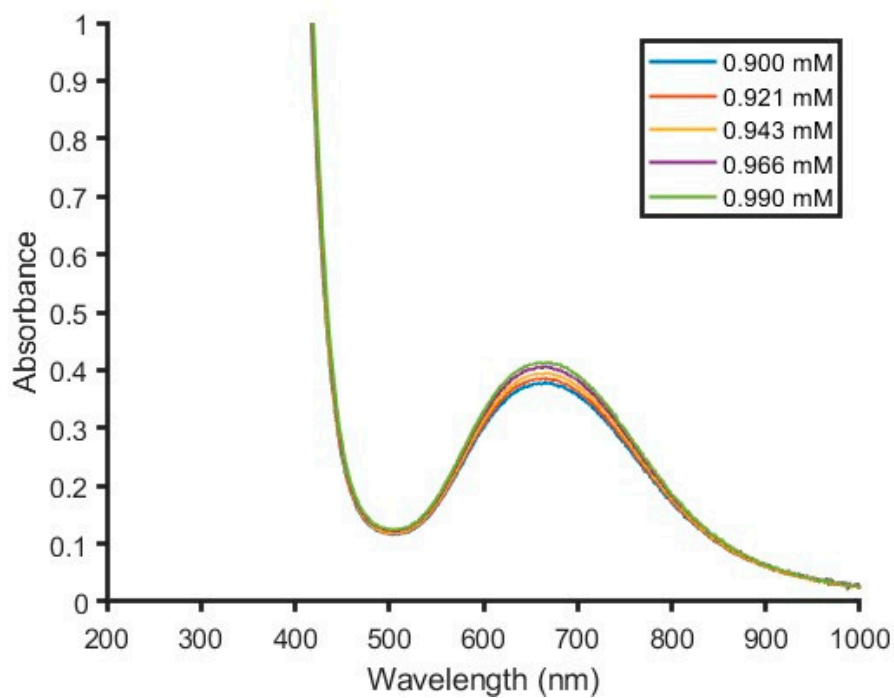

**Figure S29** Beer's law analysis of  $^3[\text{Cu}_2(\text{N}_3)_2]^{2+}$  at 661 nm.

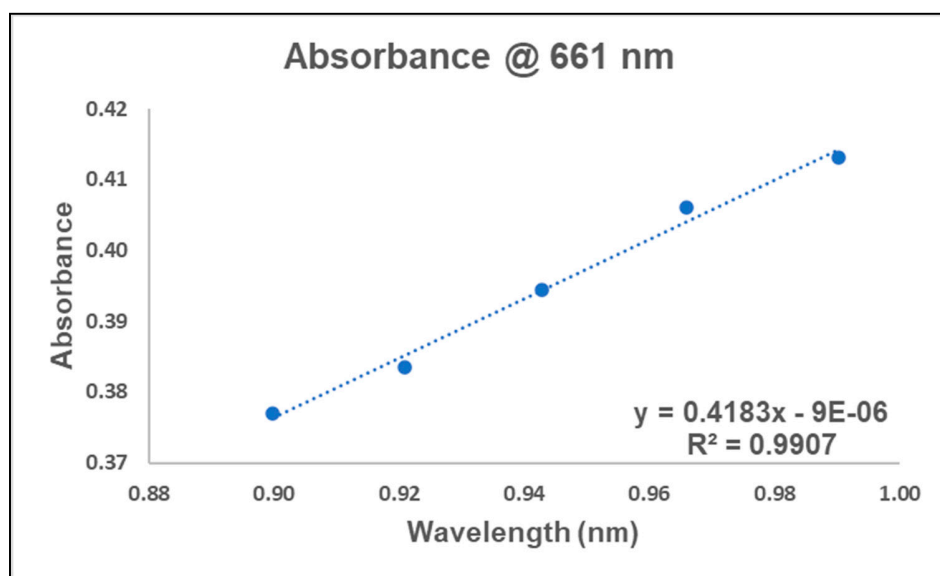

**Figure S30** Linear fit of  $^3[\text{Cu}_2(\text{N}_3)_2]^{2+}$  absorbance data at 661 nm.

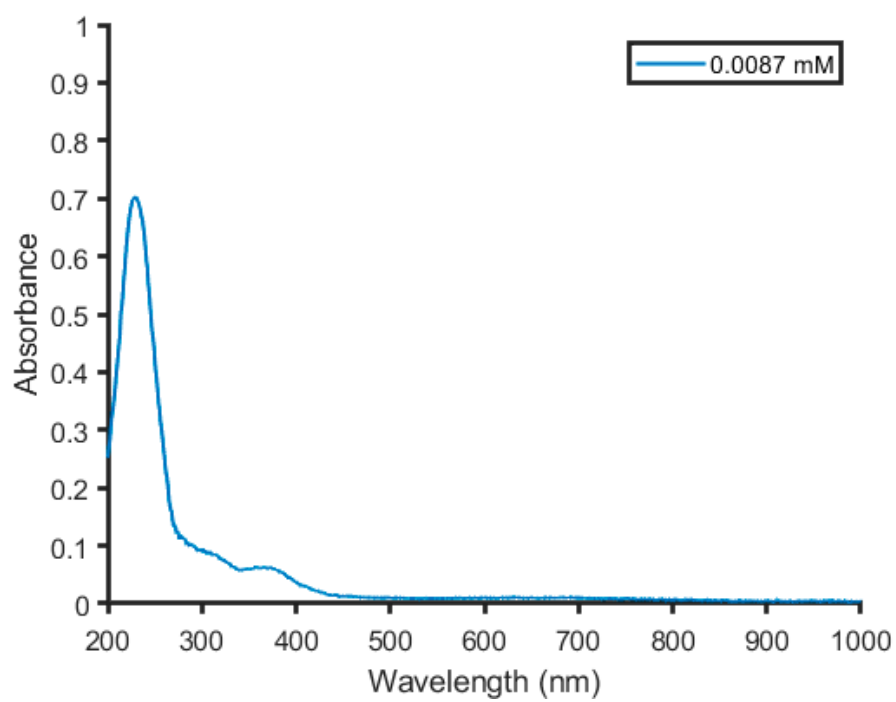

**Figure S31** Representative example of  $^3[\text{Cu}_2(\text{N}_3)_2]^{2+}$   $\pi$ - $\pi^*$  transition at 229 nm.

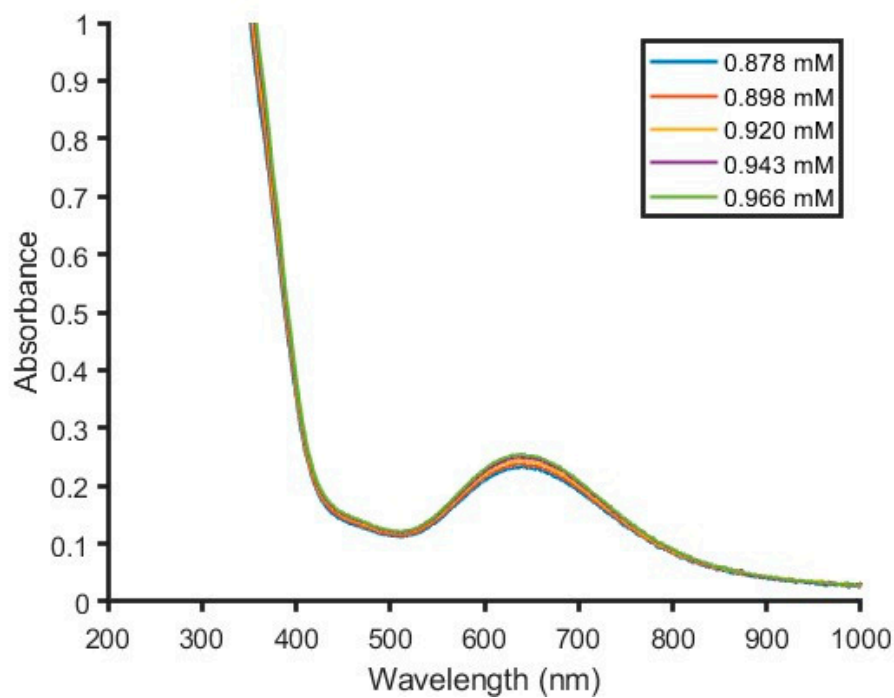

**Figure S32** Beer's law analysis of  $^3[\text{Cu}_2(\text{ONO})_2]^{2+}$  at 638 nm.

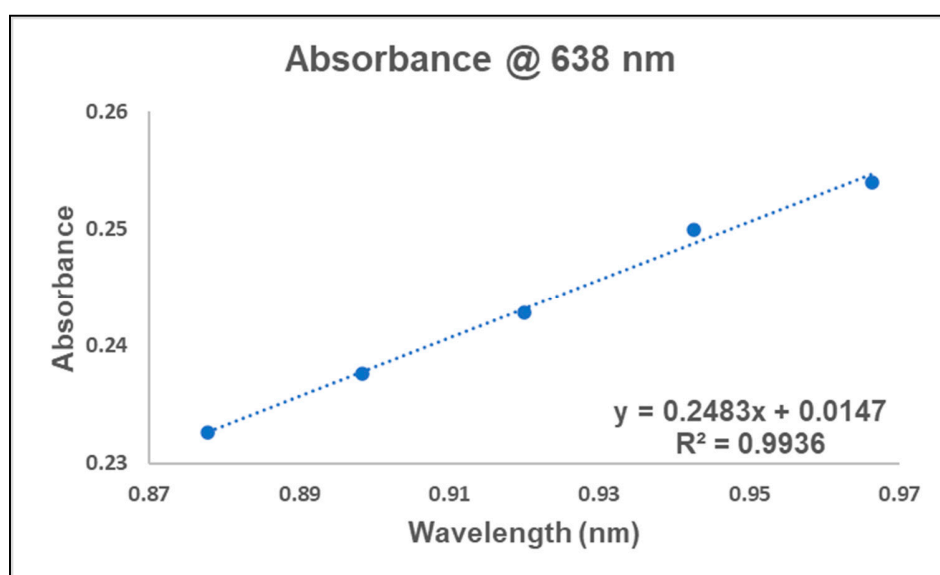

**Figure S33** Linear fit of  $^3[\text{Cu}_2(\text{ONO})_2]^{2+}$  absorbance data at 638 nm.

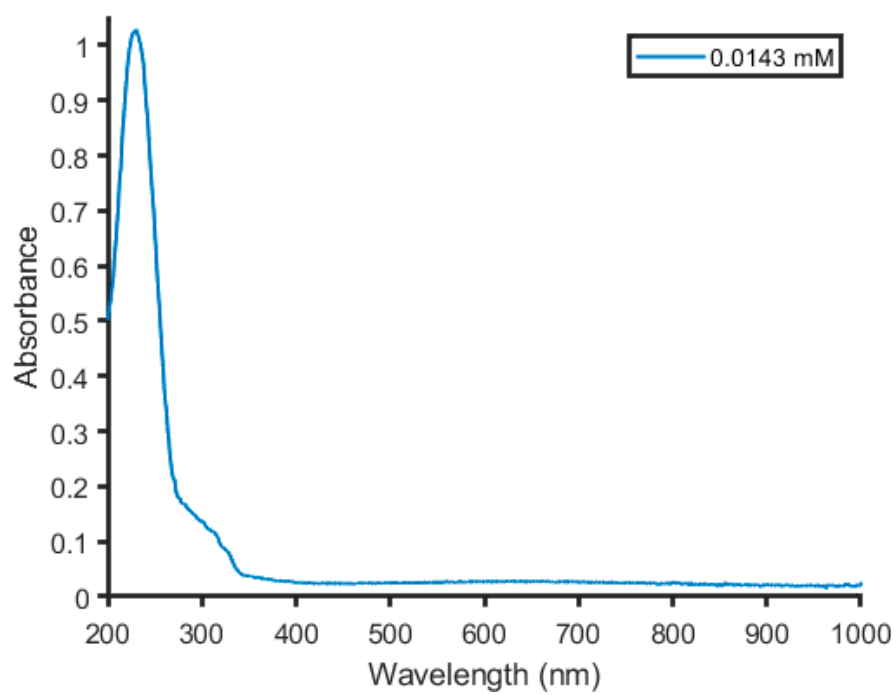

**Figure S34** Representative example of  $^3[\text{Cu}_2(\text{ONO})_2]^{2+}$   $\pi$ - $\pi^*$  transition at 230 nm.

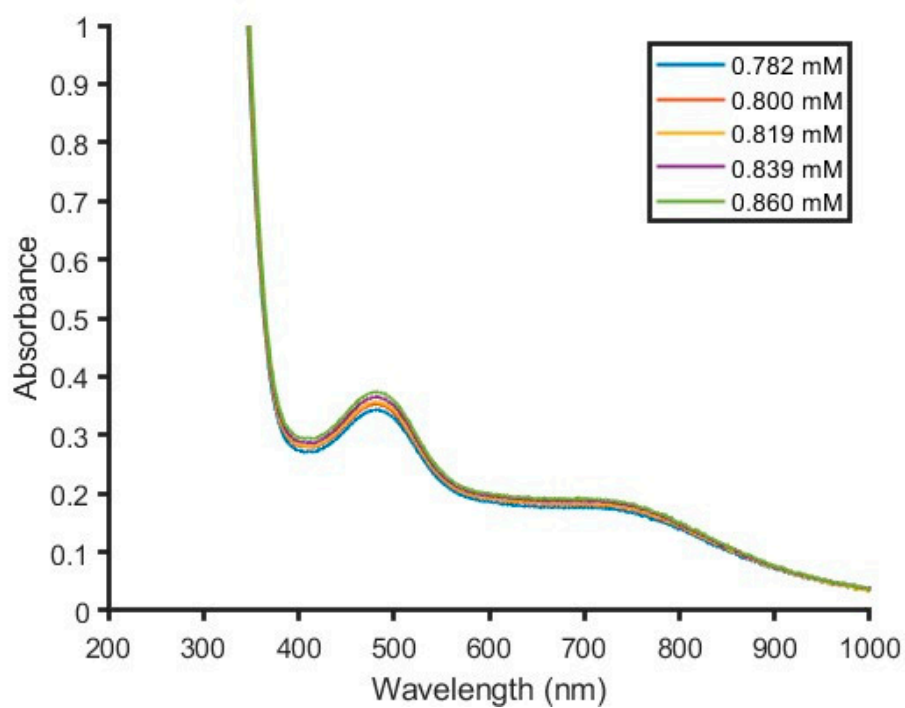

**Figure S35** Beer's law analysis of  $^3[\text{Cu}_2(\text{OTMS})_2]^{2+}$  at 481 nm.

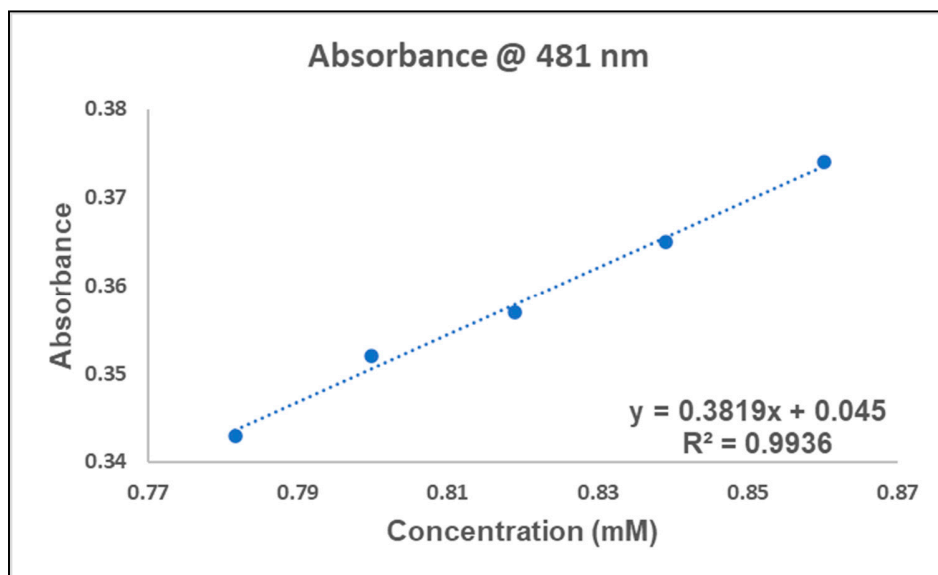

**Figure S36** Linear fit of  $^3[\text{Cu}_2(\text{OTMS})_2]^{2+}$  absorbance data at 481 nm.

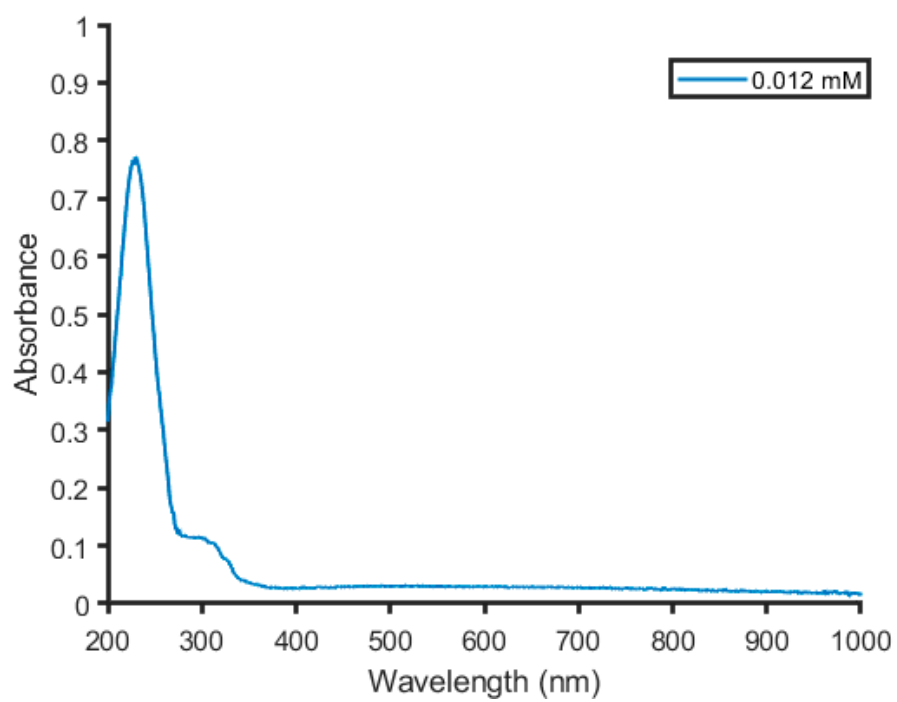

**Figure S37** Representative example of  $^3[\text{Cu}_2(\text{OTMS})_2]^{2+}$   $\pi$ - $\pi^*$  transition at 229 nm.

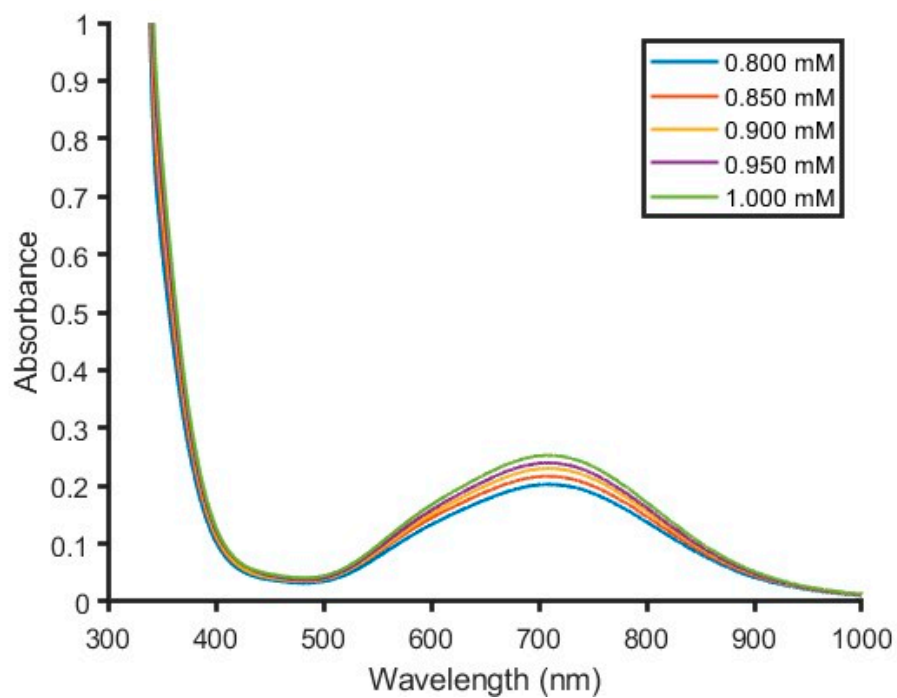

**Figure S38** Beer's law analysis of  $^3[\text{Cu}_2\text{OH}]^{3+}$  absorbance data at 708 nm.

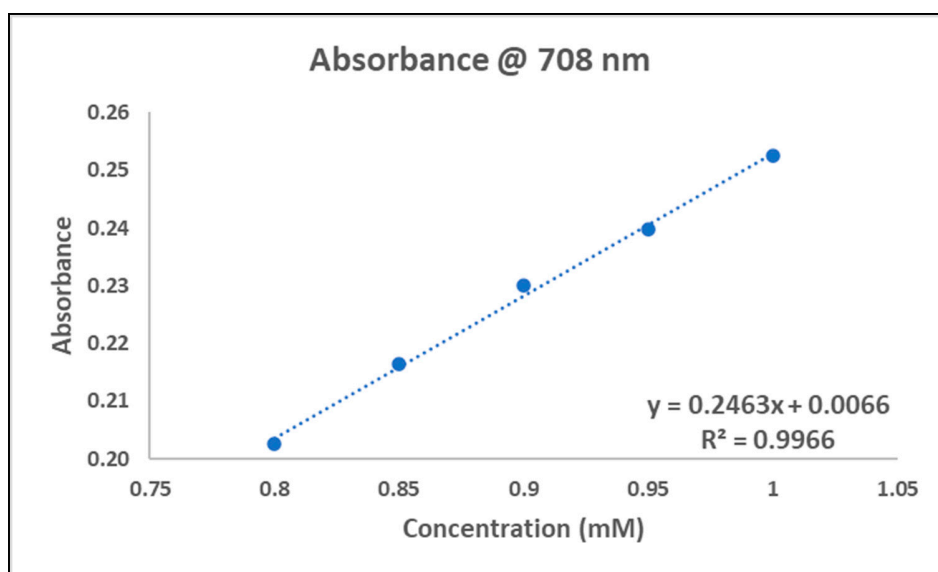

**Figure S39** Linear fit of  $^3[\text{Cu}_2\text{OH}]^{3+}$  absorbance data at 708 nm.



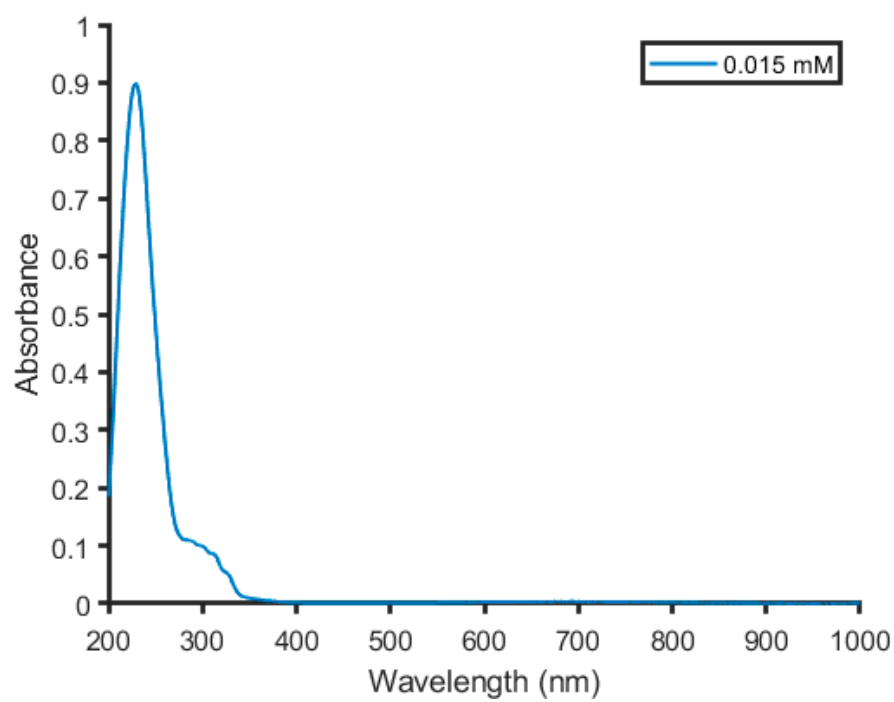

**Figure S40** Representative example of  $^3[\text{Cu}_2\text{OH}]^{3+}$   $\pi$ - $\pi^*$  transition at 229 nm.

#### IV. X-ray Crystallography

**Table S1** Summary of structure determination of  $^3[\text{Cu}_2\text{Cl}_2]^{2+}$ .

|                                      |                                                                                            |
|--------------------------------------|--------------------------------------------------------------------------------------------|
| Empirical formula                    | $\text{C}_{34}\text{H}_{46}\text{Cl}_2\text{Cu}_2\text{F}_6\text{N}_6\text{O}_6\text{S}_2$ |
| Formula weight                       | 1010.87                                                                                    |
| Temperature/K                        | 100                                                                                        |
| Crystal system                       | monoclinic                                                                                 |
| Space group                          | $P2_1/c$                                                                                   |
| a                                    | 12.5444(7) Å                                                                               |
| b                                    | 15.9671(9) Å                                                                               |
| c                                    | 11.8223(7) Å                                                                               |
| $\beta$                              | 117.009(2)°                                                                                |
| Volume                               | 2109.7(2) Å <sup>3</sup>                                                                   |
| Z                                    | 2                                                                                          |
| $d_{\text{calc}}$                    | 1.591 g/cm <sup>3</sup>                                                                    |
| $\mu$                                | 1.310 mm <sup>-1</sup>                                                                     |
| F(000)                               | 1036.0                                                                                     |
| Crystal size, mm                     | 0.3 × 0.2 × 0.02                                                                           |
| 2 $\theta$ range for data collection | 6.272 - 55.24°                                                                             |
| Index ranges                         | -16 ≤ h ≤ 16, -20 ≤ k ≤ 20, -15 ≤ l ≤ 15                                                   |
| Reflections collected                | 51161                                                                                      |
| Independent reflections              | 4881[R(int) = 0.0957]                                                                      |
| Data/restraints/parameters           | 4881/84/339                                                                                |
| Goodness-of-fit on F <sup>2</sup>    | 1.051                                                                                      |
| Final R indexes (I ≥ 2σ(I))          | R <sub>1</sub> = 0.0728, wR <sub>2</sub> = 0.1776                                          |
| Final R indexes (all data)           | R <sub>1</sub> = 0.0970, wR <sub>2</sub> = 0.1998                                          |
| Largest diff. peak/hole              | 1.03/-1.28 eÅ <sup>-3</sup>                                                                |

**Table S2** Summary of structure determination of  $^2[\text{Cu}_2\text{Cl}_2]^{2+}$ .

|                                         |                                                                                            |
|-----------------------------------------|--------------------------------------------------------------------------------------------|
| Empirical formula                       | $\text{C}_{36}\text{H}_{48}\text{Cl}_2\text{Cu}_2\text{F}_6\text{N}_8\text{O}_6\text{S}_2$ |
| Formula weight                          | 1064.92                                                                                    |
| Temperature/K                           | 100                                                                                        |
| Crystal system                          | triclinic                                                                                  |
| Space group                             | $P\bar{1}$                                                                                 |
| a                                       | 12.6430(12)Å                                                                               |
| b                                       | 13.7270(13)Å                                                                               |
| c                                       | 28.579(3)Å                                                                                 |
| $\alpha$                                | 79.827(3)°                                                                                 |
| $\beta$                                 | 82.354(3)°                                                                                 |
| $\gamma$                                | 68.329(3)°                                                                                 |
| Volume                                  | 4524.4(7)Å <sup>3</sup>                                                                    |
| Z                                       | 4                                                                                          |
| $d_{\text{calc}}$                       | 1.563 g/cm <sup>3</sup>                                                                    |
| $\mu$                                   | 1.228 mm <sup>-1</sup>                                                                     |
| F(000)                                  | 2184.0                                                                                     |
| Crystal size, mm                        | 0.38 × 0.32 × 0.25                                                                         |
| 2 $\theta$ range for data collection    | 5.772 - 55.138°                                                                            |
| Index ranges                            | -16 ≤ h ≤ 16, -17 ≤ k ≤ 17, -37 ≤ l ≤ 37                                                   |
| Reflections collected                   | 108801                                                                                     |
| Independent reflections                 | 20849[R(int) = 0.0472]                                                                     |
| Data/restraints/parameters              | 20849/0/1142                                                                               |
| Goodness-of-fit on F <sup>2</sup>       | 1.023                                                                                      |
| Final R indexes ( $I \geq 2\sigma(I)$ ) | $R_1 = 0.0664$ , $wR_2 = 0.2072$                                                           |
| Final R indexes (all data)              | $R_1 = 0.0739$ , $wR_2 = 0.2203$                                                           |
| Largest diff. peak/hole                 | 1.15/-0.69 eÅ <sup>-3</sup>                                                                |

**Table S3** Summary of structure determination of  $^3[\text{Cu}_2(\text{NCMe})_2]^{4+}$ .

|                                         |                                                                                          |
|-----------------------------------------|------------------------------------------------------------------------------------------|
| Empirical formula                       | $\text{C}_{44}\text{H}_{58}\text{Cu}_2\text{F}_{12}\text{N}_{10}\text{O}_{12}\text{S}_4$ |
| Formula weight                          | 1402.32                                                                                  |
| Temperature/K                           | 100                                                                                      |
| Crystal system                          | triclinic                                                                                |
| Space group                             | $P\bar{1}$                                                                               |
| a                                       | 9.5549(3) Å                                                                              |
| b                                       | 12.0215(4) Å                                                                             |
| c                                       | 13.3759(4) Å                                                                             |
| $\alpha$                                | 103.747(2)°                                                                              |
| $\beta$                                 | 105.331(3)°                                                                              |
| $\gamma$                                | 91.855(2)°                                                                               |
| Volume                                  | 1431.84(8) Å <sup>3</sup>                                                                |
| Z                                       | 1                                                                                        |
| $d_{\text{calc}}$                       | 1.626 g/cm <sup>3</sup>                                                                  |
| $\mu$                                   | 3.224 mm <sup>-1</sup>                                                                   |
| F(000)                                  | 718.0                                                                                    |
| Crystal size, mm                        | 0.11 × 0.04 × 0.03                                                                       |
| 2 $\theta$ range for data collection    | 7.088 - 148.932°                                                                         |
| Index ranges                            | -11 ≤ h ≤ 11, -12 ≤ k ≤ 15, -16 ≤ l ≤ 16                                                 |
| Reflections collected                   | 18204                                                                                    |
| Independent reflections                 | 5765[R(int) = 0.0476]                                                                    |
| Data/restraints/parameters              | 5765/0/386                                                                               |
| Goodness-of-fit on F <sup>2</sup>       | 1.074                                                                                    |
| Final R indexes ( $I \geq 2\sigma(I)$ ) | $R_1 = 0.0520$ , $wR_2 = 0.1434$                                                         |
| Final R indexes (all data)              | $R_1 = 0.0628$ , $wR_2 = 0.1567$                                                         |
| Largest diff. peak/hole                 | 0.66/-0.85 e Å <sup>-3</sup>                                                             |

**Table S4** Summary of structure determination of  $^3[\text{Cu}_2\text{Cl}]^{3+}$ .

|                                         |                                                                                   |
|-----------------------------------------|-----------------------------------------------------------------------------------|
| Empirical formula                       | $\text{C}_{35}\text{H}_{46}\text{ClCu}_2\text{F}_9\text{N}_6\text{O}_9\text{S}_3$ |
| Formula weight                          | 1124.49                                                                           |
| Temperature/K                           | 100                                                                               |
| Crystal system                          | monoclinic                                                                        |
| Space group                             | $P2_1/n$                                                                          |
| a                                       | 15.4647(5) Å                                                                      |
| b                                       | 11.5756(4) Å                                                                      |
| c                                       | 25.5577(6) Å                                                                      |
| $\beta$                                 | 96.493(3)°                                                                        |
| Volume                                  | 4545.8(2) Å <sup>3</sup>                                                          |
| Z                                       | 4                                                                                 |
| $d_{\text{calc}}$                       | 1.643 g/cm <sup>3</sup>                                                           |
| $\mu$                                   | 1.227 mm <sup>-1</sup>                                                            |
| F(000)                                  | 2296.0                                                                            |
| Crystal size, mm                        | 0.46 × 0.16 × 0.06                                                                |
| 2 $\theta$ range for data collection    | 4.584 - 56.564°                                                                   |
| Index ranges                            | -20 ≤ h ≤ 20, -15 ≤ k ≤ 15, -32 ≤ l ≤ 34                                          |
| Reflections collected                   | 79844                                                                             |
| Independent reflections                 | 11270[R(int) = 0.0508]                                                            |
| Data/restraints/parameters              | 11270/216/651                                                                     |
| Goodness-of-fit on F <sup>2</sup>       | 1.033                                                                             |
| Final R indexes ( $I \geq 2\sigma(I)$ ) | $R_1 = 0.0485$ , $wR_2 = 0.1237$                                                  |
| Final R indexes (all data)              | $R_1 = 0.0618$ , $wR_2 = 0.1309$                                                  |
| Largest diff. peak/hole                 | 1.53/-0.75 eÅ <sup>-3</sup>                                                       |

**Table S5** Summary of structure determination of  $^3[\text{Cu}_2\text{F}]^{3+}$ .

|                                         |                                                                                    |
|-----------------------------------------|------------------------------------------------------------------------------------|
| Empirical formula                       | $\text{C}_{35}\text{H}_{46}\text{Cu}_2\text{F}_{10}\text{N}_6\text{O}_9\text{S}_3$ |
| Formula weight                          | 1108.04                                                                            |
| Temperature/K                           | 100                                                                                |
| Crystal system                          | monoclinic                                                                         |
| Space group                             | P2/c                                                                               |
| a                                       | 13.7556(5) Å                                                                       |
| b                                       | 9.1159(3) Å                                                                        |
| c                                       | 17.8988(6) Å                                                                       |
| $\beta$                                 | 103.059(4)°                                                                        |
| Volume                                  | 2186.37(13) Å <sup>3</sup>                                                         |
| Z                                       | 2                                                                                  |
| $d_{\text{calc}}$                       | 1.683 g/cm <sup>3</sup>                                                            |
| $\mu$                                   | 1.218 mm <sup>-1</sup>                                                             |
| F(000)                                  | 1132.0                                                                             |
| Crystal size, mm                        | 0.44 × 0.14 × 0.08                                                                 |
| 2 $\theta$ range for data collection    | 4.672 - 56.564°                                                                    |
| Index ranges                            | -18 ≤ h ≤ 17, -10 ≤ k ≤ 12, -23 ≤ l ≤ 23                                           |
| Reflections collected                   | 42756                                                                              |
| Independent reflections                 | 5424[R(int) = 0.0553]                                                              |
| Data/restraints/parameters              | 5424/0/336                                                                         |
| Goodness-of-fit on F <sup>2</sup>       | 1.035                                                                              |
| Final R indexes [ $I \geq 2\sigma(I)$ ] | $R_1 = 0.0430$ , $wR_2 = 0.1037$ Final                                             |
| R indexes (all data)                    | $R_1 = 0.0510$ , $wR_2 = 0.1077$                                                   |
| Largest diff. peak/hole                 | 1.88/-1.11 eÅ <sup>-3</sup>                                                        |

**Table S6** Summary of structure determination of  $^3[\text{Cu}_2(\text{N}_3)_2]^{2+}$ .

|                                         |                                                                                    |
|-----------------------------------------|------------------------------------------------------------------------------------|
| Empirical formula                       | $\text{C}_{34}\text{H}_{46}\text{Cu}_2\text{F}_6\text{N}_{12}\text{O}_6\text{S}_2$ |
| Formula weight                          | 1024.03                                                                            |
| Temperature/K                           | 100                                                                                |
| Crystal system                          | monoclinic                                                                         |
| Space group                             | $P2_1/c$                                                                           |
| a                                       | 7.6454(2) Å                                                                        |
| b                                       | 12.0716(2) Å                                                                       |
| c                                       | 23.2817(5) Å                                                                       |
| $\beta$                                 | 94.729(2)°                                                                         |
| Volume                                  | 2141.41(8) Å <sup>3</sup>                                                          |
| Z                                       | 2                                                                                  |
| $d_{\text{calc}}$                       | 1.588 g/cm <sup>3</sup>                                                            |
| $\mu$                                   | 1.175 mm <sup>-1</sup>                                                             |
| F(000)                                  | 1052.0                                                                             |
| Crystal size, mm                        | 0.18 × 0.17 × 0.12                                                                 |
| 2 $\theta$ range for data collection    | 3.804 - 56.562°                                                                    |
| Index ranges                            | -10 ≤ h ≤ 9, -16 ≤ k ≤ 16, -31 ≤ l ≤ 31                                            |
| Reflections collected                   | 42276                                                                              |
| Independent reflections                 | 5301[R(int) = 0.0338]                                                              |
| Data/restraints/parameters              | 5301/0/285                                                                         |
| Goodness-of-fit on F <sup>2</sup>       | 1.042                                                                              |
| Final R indexes [ $I \geq 2\sigma(I)$ ] | $R_1 = 0.0236$ , $wR_2 = 0.0610$ Final                                             |
| R indexes (all data)                    | $R_1 = 0.0262$ , $wR_2 = 0.0621$                                                   |
| Largest diff. peak/hole                 | 0.42/-0.32 eÅ <sup>-3</sup>                                                        |

**Table S7** Summary of structure determination of  $^3[\text{Cu}_2(\text{ONO})_2]^{2+}$ 

|                                      |                                                                                    |
|--------------------------------------|------------------------------------------------------------------------------------|
| Empirical formula                    | $\text{C}_{34}\text{H}_{46}\text{Cu}_2\text{F}_6\text{N}_8\text{O}_{10}\text{S}_2$ |
| Formula weight                       | 1031.99                                                                            |
| Temperature/K                        | 100                                                                                |
| Crystal system                       | monoclinic                                                                         |
| Space group                          | $P2_1/c$                                                                           |
| a                                    | 8.1673(3) Å                                                                        |
| b                                    | 11.6841(4) Å                                                                       |
| c                                    | 23.3957(7) Å                                                                       |
| $\beta$                              | 98.843(3)°                                                                         |
| Volume                               | 2206.06(13) Å <sup>3</sup>                                                         |
| Z                                    | 2                                                                                  |
| $d_{\text{calc}}$                    | 1.554 g/cm <sup>3</sup>                                                            |
| $\mu$                                | 1.145 mm <sup>-1</sup>                                                             |
| F(000)                               | 1060.0                                                                             |
| Crystal size, mm                     | 0.26 × 0.16 × 0.09                                                                 |
| 2 $\theta$ range for data collection | 4.958 - 56.56°                                                                     |
| Index ranges                         | -10 ≤ h ≤ 10, -15 ≤ k ≤ 15, -31 ≤ l ≤ 30                                           |
| Reflections collected                | 40925                                                                              |
| Independent reflections              | 5463[R(int) = 0.0814]                                                              |
| Data/restraints/parameters           | 5463/18/294                                                                        |
| Goodness-of-fit on F <sup>2</sup>    | 1.066                                                                              |
| Final R indexes (I ≥ 2σ(I))          | R <sub>1</sub> = 0.0304, wR <sub>2</sub> = 0.0745                                  |
| Final R indexes (all data)           | R <sub>1</sub> = 0.0373, wR <sub>2</sub> = 0.0772                                  |
| Largest diff. peak/hole              | 0.45/-0.45 eÅ <sup>-3</sup>                                                        |



**Table S8** Summary of structure determination of  $^3[\text{Cu}_2(\text{OTMS})_2]^{2+}$ 

|                                           |                                                                        |
|-------------------------------------------|------------------------------------------------------------------------|
| Empirical formula                         | $\text{C}_{20}\text{H}_{32}\text{CuF}_3\text{N}_3\text{O}_4\text{SSi}$ |
| Formula weight                            | 559.17                                                                 |
| Temperature/K                             | 100                                                                    |
| Crystal system                            | monoclinic                                                             |
| Space group                               | $P2_1/n$                                                               |
| a                                         | 13.8850(14) Å                                                          |
| b                                         | 13.0849(13) Å                                                          |
| c                                         | 15.4405(15) Å                                                          |
| $\beta$                                   | 114.690(2)°                                                            |
| Volume                                    | 2548.8(4) Å <sup>3</sup>                                               |
| Z                                         | 4                                                                      |
| $d_{\text{calc}}$                         | 1.457 g/cm <sup>3</sup>                                                |
| $\mu$                                     | 1.038 mm <sup>-1</sup>                                                 |
| F(000)                                    | 1164.0                                                                 |
| Crystal size, mm                          | 0.3 × 0.25 × 0.2                                                       |
| 2 $\theta$ range for data collection      | 4.484 - 55.018°                                                        |
| Index ranges                              | -18 ≤ h ≤ 17, -16 ≤ k ≤ 17, -20 ≤ l ≤ 20                               |
| Reflections collected                     | 46045                                                                  |
| Independent reflections                   | 5846[R(int) = 0.0188]                                                  |
| Data/restraints/parameters                | 5846/18/306                                                            |
| Goodness-of-fit on F <sup>2</sup>         | 1.039                                                                  |
| Final R indexes ( $ I  \geq 2\sigma(I)$ ) | $R_1 = 0.0373$ , $wR_2 = 0.0967$                                       |
| Final R indexes (all data)                | $R_1 = 0.0405$ , $wR_2 = 0.0995$                                       |
| Largest diff. peak/hole                   | 1.32/-1.22 eÅ <sup>-3</sup>                                            |

**Table S9** Summary of structure determination of  $^3[\text{Cu}_2\text{OH}]^{3+}$ .

|                                           |                                                                                    |
|-------------------------------------------|------------------------------------------------------------------------------------|
| Empirical formula                         | $\text{C}_{39}\text{H}_{55}\text{Cu}_2\text{F}_9\text{N}_6\text{O}_{11}\text{S}_3$ |
| Formula weight                            | 1178.15                                                                            |
| Temperature/K                             | 100                                                                                |
| Crystal system                            | triclinic                                                                          |
| Space group                               | $P\bar{1}$                                                                         |
| a                                         | 12.1466(12)Å                                                                       |
| b                                         | 14.6587(16)Å                                                                       |
| c                                         | 14.8914(16)Å                                                                       |
| $\alpha$                                  | 67.013(4)°                                                                         |
| $\beta$                                   | 81.872(4)°                                                                         |
| $\gamma$                                  | 83.338(4)°                                                                         |
| Volume                                    | 2411.0(4)Å <sup>3</sup>                                                            |
| Z                                         | 2                                                                                  |
| $d_{\text{calc}}$                         | 1.623 g/cm <sup>3</sup>                                                            |
| $\mu$                                     | 1.110 mm <sup>-1</sup>                                                             |
| F(000)                                    | 1212.0                                                                             |
| Crystal size, mm                          | 0.41 × 0.33 × 0.05                                                                 |
| 2 $\theta$ range for data collection      | 5.976 - 55.158°                                                                    |
| Index ranges                              | -15 ≤ h ≤ 15, -19 ≤ k ≤ 19, -19 ≤ l ≤ 19                                           |
| Reflections collected                     | 67617                                                                              |
| Independent reflections                   | 11091[R(int) = 0.0686]                                                             |
| Data/restraints/parameters                | 11091/259/753                                                                      |
| Goodness-of-fit on F <sup>2</sup>         | 1.127                                                                              |
| Final R indexes ( $ I  \geq 2\sigma(I)$ ) | R <sub>1</sub> = 0.0564, wR <sub>2</sub> = 0.0903                                  |
| Final R indexes (all data)                | R <sub>1</sub> = 0.0800, wR <sub>2</sub> = 0.0977                                  |
| Largest diff. peak/hole                   | 0.94/-0.59 eÅ <sup>-3</sup>                                                        |
